# Supplementary material for: Evaluation of Genetic Association of the INK4 Locus with Primary Open Angle Glaucoma in East Indian Population
Source: PubMed Central journal article supplement — Sci Rep. 2014 May 30;4:5115. doi: 10.1038/srep05115 (PMC4038833; doi:10.1038/srep05115), 2014-05-30
Supplement: srep05115-s1.pdf [file srep05115-s1.pdf]

## **Evaluation of Genetic Association of the INK4 Locus with Primary Open Angle Glaucoma in East Indian Population**

Mansi Vishal<sup>1,2</sup>, Anchal Sharma<sup>2,3</sup>, Lalit Kaurani<sup>2</sup>, Subhadip Chakraborty<sup>1</sup>, Jharna Ray<sup>4</sup>,  
Abhijit Sen<sup>5</sup>, Arijit Mukhopadhyay<sup>2,3</sup>, Kunal Ray<sup>1,3</sup>

<sup>1</sup>Molecular and Human Genetics Division, CSIR-Indian Institute of Chemical Biology, Kolkata, India; <sup>2</sup>Genomics & Molecular Medicine, CSIR-Institute of Genomics & Integrative Biology, Delhi, India; <sup>3</sup>Academy of Scientific and Innovative Research (AcSIR), New Delhi, India; <sup>4</sup>S.N. Pradhan Centre for Neurosciences, University of Calcutta, Kolkata, India; <sup>5</sup>Dristi Pradip, Kolkata, India

Supplementary Table S1: Studies done on the association of 9p21 region SNPs with POAG and its subtypes

| Population ancestry | Top associated SNP from 9p21 region (minor allele) | p- value/OR                 | Type of study | POAG subtype               | Reference                                     |
|---------------------|----------------------------------------------------|-----------------------------|---------------|----------------------------|-----------------------------------------------|
| African             | rs10120688 (A),<br>rs10965245 (A)                  | 0.002/1.21,<br>0.0005/0.73  | Case-control  | POAG, NTG                  | <i>Liu et al, IOVS 2013 [1]</i>               |
| European            | rs2157719 (G)                                      | 1.86E <sup>-18</sup> /0.69  | Meta-analysis | POAG                       | <i>Wiggs et al, PLoS One 2013 [2]</i>         |
| European            | rs1063192 (G)                                      | 2.2*10 <sup>-5</sup> /0.74  | Case-control  | POAG                       | <i>Dimasi et al, Am J Ophthalmol 2012 [3]</i> |
| Japanese            | rs523096 (A)                                       | 1.59*10 <sup>-5</sup> /1.99 | GWAS          | NTG                        | <i>Takamoto et al, PLoS One 2012 [4]</i>      |
| African             | rs1063192 (C)                                      | 0.0008/0.39                 | Case-control  | POAG                       | <i>Cao D et al, PLoS One 2012 [5]</i>         |
| European            | rs10120688                                         | 1.2x10 <sup>-5</sup> /NA    | GWAS          | POAG                       | <i>Gibson et al, MolVis 2012 [6]</i>          |
| Japanese            | rs1063192 (C)                                      | 0.0023/NA                   | Case-control  | NTG                        | <i>Mabuchi et al, Ophthalmology 2012 [7]</i>  |
| European            | rs10120688 (A)                                     | 0.005/1.25                  | Case-control  | Advanced POAG, HTG,<br>NTG | <i>Burdon et al, Ophthalmology 2012 [8]</i>   |
| Japanese            | rs523096 (A)                                       | 3.8*10 <sup>-9</sup> /1.86  | GWAS          | POAG, NPG, HPG             | <i>Nakano et al, PLoS One 2012 [9]</i>        |
| Japanese            | rs1063192 (C)                                      | 5.68*10 <sup>-5</sup> /0.79 | GWAS          | POAG                       | <i>Osman et al, Hum Mol Genet 2012 [10]</i>   |
| European            | rs1063192 (G)                                      | 1.41*10 <sup>-8</sup> /0.76 | Meta-analysis | POAG                       | <i>Ramdas et al, Hum Mol Genet 2011 [11]</i>  |
| European            | rs1063192 (G)                                      | 0.0045/0.73                 | Case-control  | VCDR, POAG                 | <i>Fan et al, IOVS 2011 [12]</i>              |
| European            | rs4977756 (A)                                      | 4.7*10 <sup>-9</sup> /1.5   | GWAS          | POAG                       | <i>Burdon et al, Nat Genet 2011 [13]</i>      |
| European            | rs1063192 (G)                                      | 6.15*10 <sup>-11</sup> /NA  | GWAS          | VCDR                       | <i>Ramdas et al, PLoS Genet 2010 [14]</i>     |

Abbreviations: POAG- Primary Open Angle Glaucoma, NTG- Normal Tension Glaucoma, HTG- High Tension Glaucoma, HPG- High Pressure Glaucoma, NPG- Normal Pressure Glaucoma, VCDR- Vertical Cup-disc ratio, NA-Not available.

Note: Abbreviations used under 'POAG subtype' column are same as described in the original study. Numbers in parenthesis used in the last column denote the reference numbers.

- [1] Liu Y, Hauser MA, Akafo SK, Qin X, Miura S, Gibson JR. et al. *IOVS* **17**, 6248-54 (2013).
- [2] Wiggs, J.L., et al. *PLoS Genet.* **8**, e1002654 (2013).
- [3] Dimasi DP, Burdon KP, Hewitt AW, Fitzgerald J, Wang JJ, Healey PR. et al. *Am J Ophthalmol* **154**, 833-842 e2 (2012).
- [4] Takamoto M, Kaburaki T, Mabuchi A, Araie M, Amano S, Aihara M. et al. *PLoS One* **7**, e40107 (2012).
- [5] Cao D, Jiao X, Liu X, Hennis A, Leske MC, Nemesure B. et al. *PLoS One* **7**, e39278 (2012).
- [6] Gibson J, Griffiths H, De Salvo G, Cole M, Jacob A, Macleod A. et al. *Mol Vis* **18**, 1083-92 (2012).
- [7] Mabuchi F, Sakurada Y, Kashiwagi K, Yamagata Z, Iijima H, Tsukahara S. *Ophthalmology* **119**, 1819-1825 (2012).
- [8] Burdon KP, Crawford A, Casson RJ, Hewitt AW, Landers J, Danoy P. et al. *Ophthalmology* **119**, 1539-1545 (2012).
- [9] Nakano M, Ikeda Y, Tokuda Y, Fuwa M, Omi N, Ueno M. et al. *PLoS One* **7**, e33389 (2012).
- [10] Osman W, Low SK, Takahashi A, Kubo M, Nakamura Y. *Hum Mol Genet* **21**, 2836-42 (2012).
- [11] Ramdas WD, van Koolwijk LM, Lemij HG, Pasutto F, Cree AJ, Thorleifsson G. et al. *Hum Mol Genet* **20**, 2464-71(2011).
- [12] Fan BJ, Wang DY, Pasquale LR, Haines JL, Wiggs JL. *IOVS* **52**, 1788-1792 (2011).
- [13] Burdon KP, Macgregor S, Hewitt AW, Sharma S, Chidlow G, Mills RA. et al. *Nat Genet* **43**, 574-8 (2011).
- [14] Ramdas WD, van Koolwijk LME, Ikram MK, Jansonius NM, de Jong PTVM, Bergen AAB. et al. *PLoS Genet* **6** e1000978 (2010).

Supplementary Table S2: Haplotype association using 20 tag SNPs in 9p21 region

| Haplotype             | Frequency in cases (n=700) | Frequency in controls (n=708) | p-value |
|-----------------------|----------------------------|-------------------------------|---------|
| AAAGAGCAGAAGGAAAAACG* | 0.005                      | 0.017                         | 0.0381  |
| CAGGAAAAGAAGAAAAAGCA  | 0.024                      | 0.043                         | 0.0597  |
| CAGGAAAAGAGGACAAAACG  | 0.335                      | 0.288                         | 0.0614  |
| AAAGAGCAGAAGGAAAAGCA  | 0.008                      | 0.0200                        | 0.0633  |
| AAAGAGCAGAAGACAAAACG  | 0.016                      | 0.006                         | 0.0783  |
| CAGGAAAAGAGGACAAAACA  | 0.016                      | 0.023                         | 0.3866  |
| CAGAAAAAGAAGAAAAAGCA  | 0.078                      | 0.067                         | 0.4198  |
| CAGGAAAGGAAGGCAGAGCA  | 0.011                      | 0.016                         | 0.4555  |
| AAGGCGAAGAAGGCGAAAAA  | 0.06                       | 0.070                         | 0.4694  |
| AAGGCAAAGGGGACAACACG  | 0.013                      | 0.010                         | 0.5949  |
| CGGGAAAGGAAGGCAGAGCA  | 0.171                      | 0.161                         | 0.6284  |
| CGGGAAAGGAAGGCAGAGCG  | 0.011                      | 0.010                         | 0.8504  |
| CAGAAAAAGAAGAAAAACG   | 0.085                      | 0.085                         | 0.9707  |

\* Haplotype with significant p-value
